# Supplementary material
Source: Springer Nature journal article supplement (https://www.springermedizin.de/resource/supplementary/12883_2013_1153_MOESM1_ESM.pdf/9456652)
Supplement: MOESM1 [file 9456652]

**Patient population:**

- A. Patients with chronic Low Back Pain
- B. Patients with chronic Neck/Shoulder Pain
- C. Patients with chronic pain from Peripheral Nerve Damage

Specialized pain centers  
Departments of neurology

General practices

N=438 , 146 patients in each patient group

Medical history: Date of birth; gender; duration of complaints; presence of diabetes mellitus; co-morbidity

Examination by both physicians

Questionnaires:

- PDQ
- DN4
- DRI
- HADS
- SF-36
- PAS

20% QST measurement (n=88)

2 weeks follow-up (PDQ & DN4 + PGIC)

- Test-retest reliability

3 months follow-up (PDQ & DN4 + PGIC)

- Medical record control for patients with probable neuropathic pain component: Does the patient still have a probable neuropathic pain component or has it become a possible, unlikely or definite neuropathic pain component?
- Prognostic value
